# Supplementary material
Source: HighWire-hosted journal article supplement (https://tech.snmjournals.org/highwire/filestream/8666/field_highwire_adjunct_files/0/195438_Supplemental_Color_Version_of_Figures.pdf)
Supplement: 195438_Supplemental_Color_Version_of_Figures.pdf [file 195438_Supplemental_Color_Version_of_Figures.pdf]

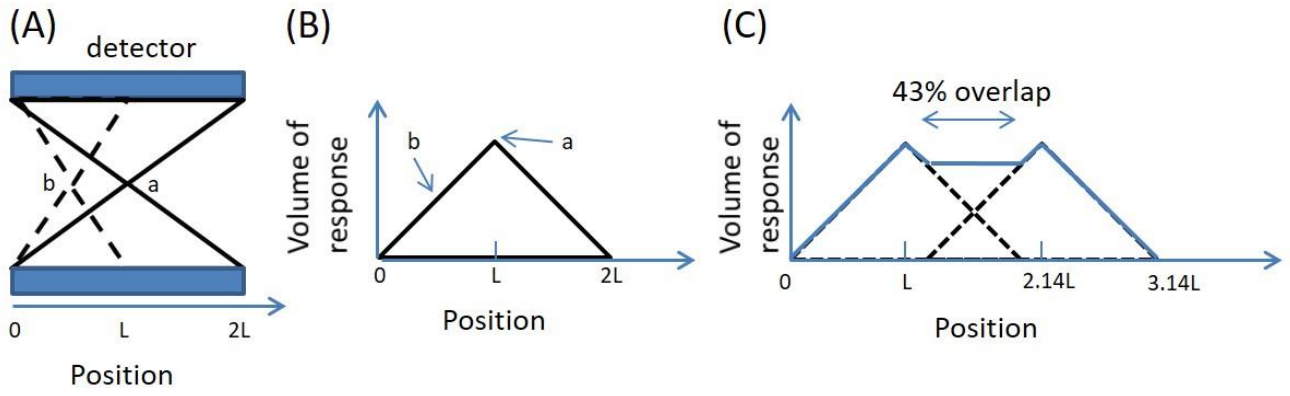

Color version of Figure 1.

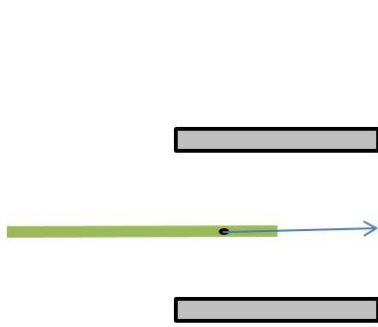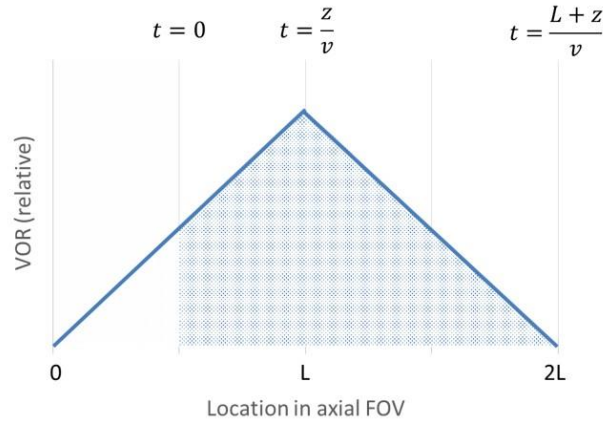

Color version of Figure 2.

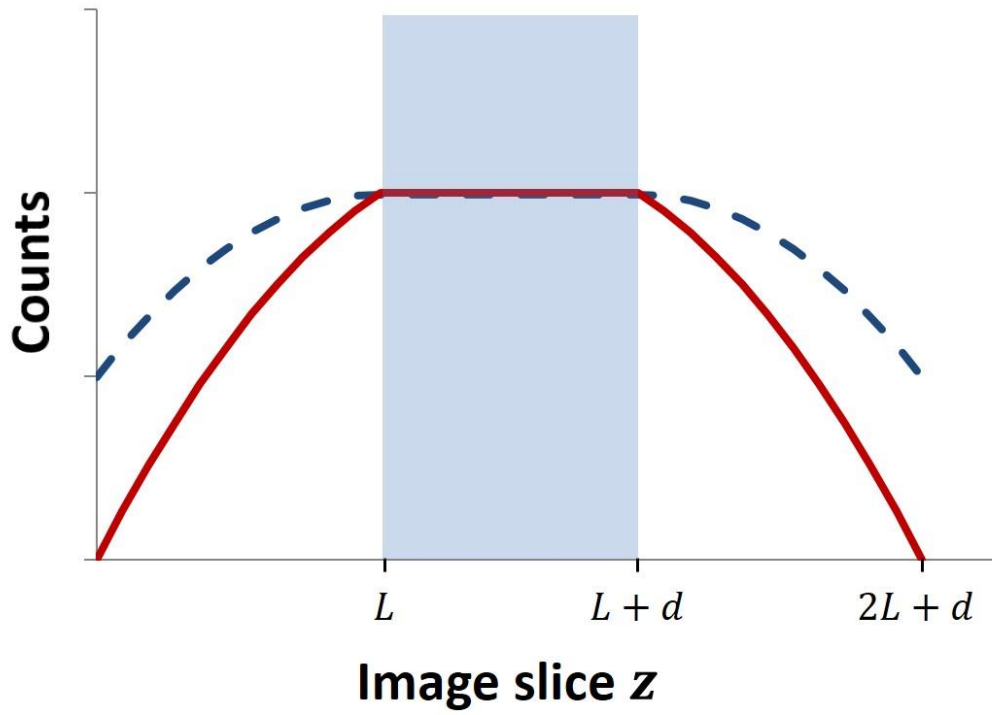

Color version of Figure 3.

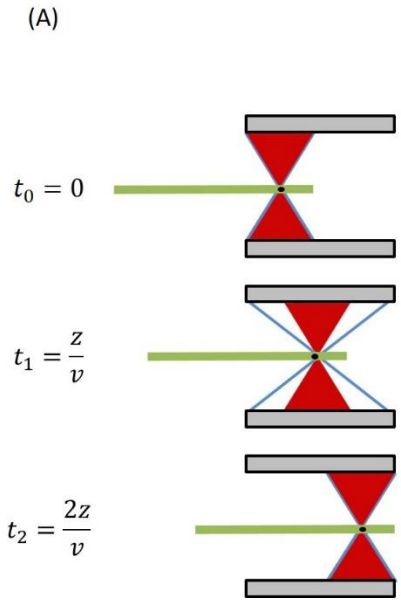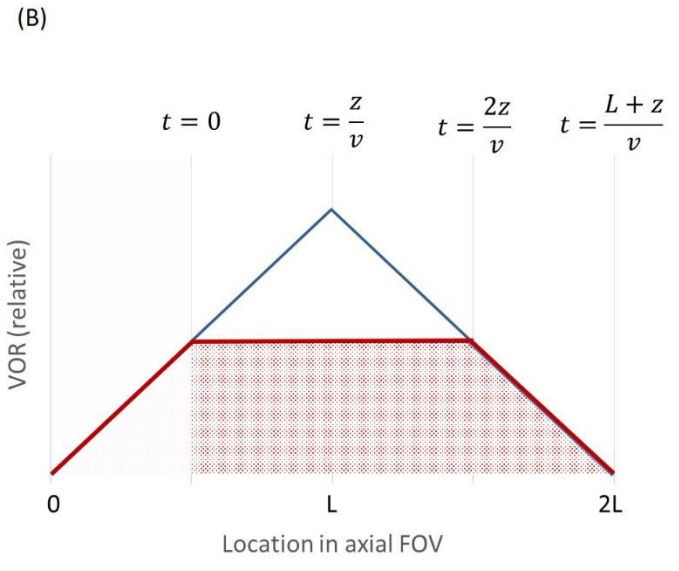

Color version of Figure 4.

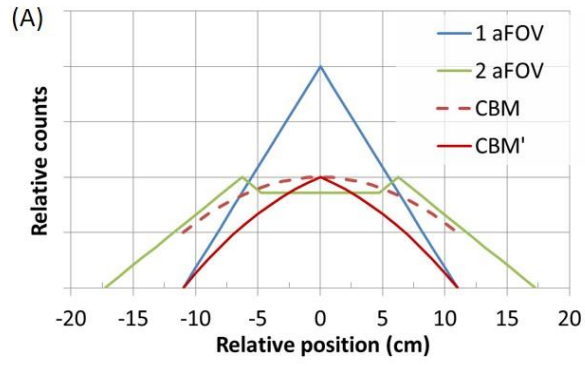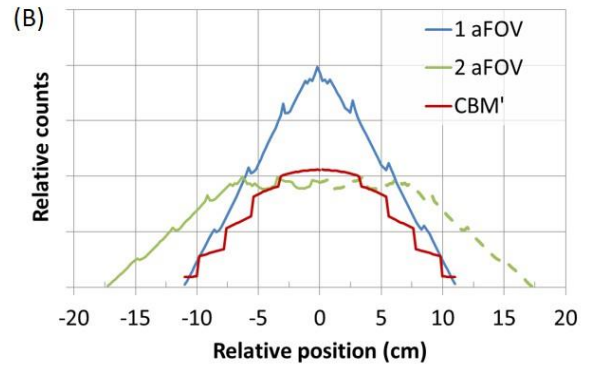

Color version of Figure 5.

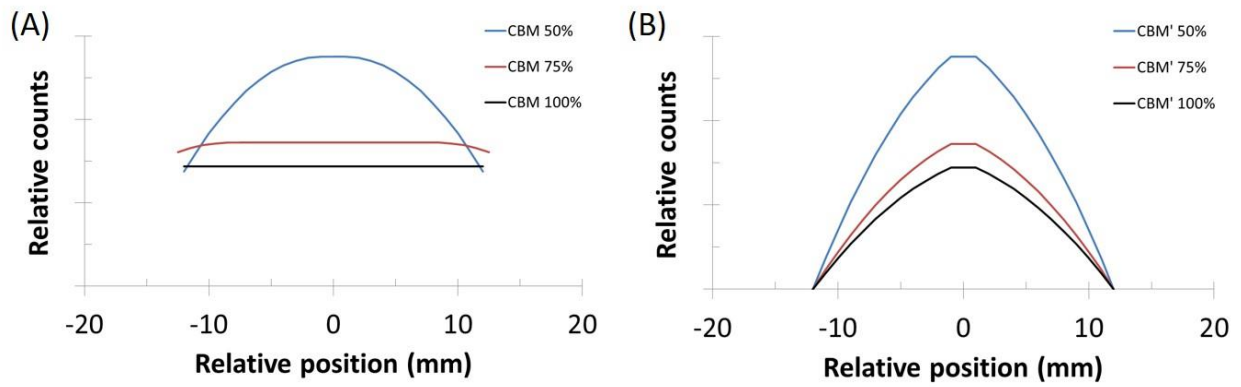

Color version of Figure 6.

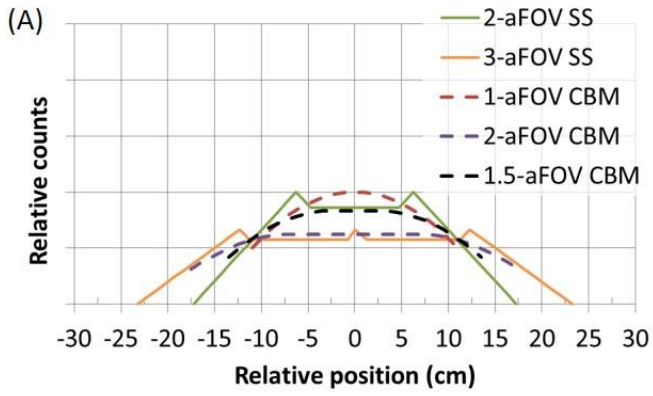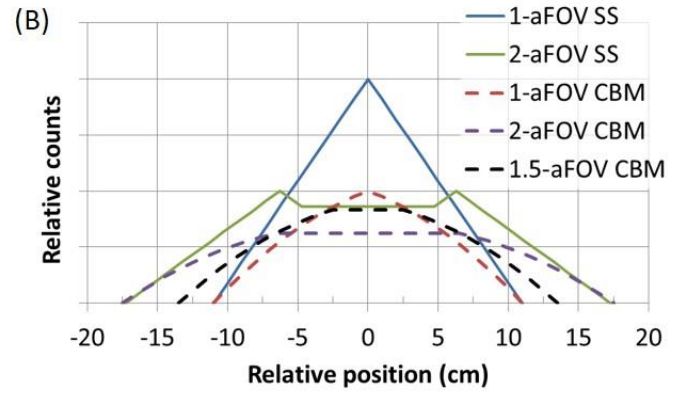

Color version of Figure 7.
